# Supplementary material for: Influence of insecticide resistance on the biting and resting preferences of malaria vectors in the Gambia
Source: PLoS One. 2021 Jun 24;16(6):e0241023. doi: 10.1371/journal.pone.0241023 (PMC8224845; doi:10.1371/journal.pone.0241023)
Supplement: S1 File — (XLSX) [file pone.0241023.s001.xlsx]

## Sheet: Species and resistance data
Serial Number	Resting_location	Region	Molecular_spp	Vgsc-1014 alleles	Vgsc-1575 alleles	GSTe2-114 alleles	ACE1-119 alleles
1	Indoor	URR	An. arabiensis	Mutant_east	Wild type	Wild type	Wild type
2	Indoor	URR	An. arabiensis	Mutant_east	Wild type	Wild type	Wild type
3	Indoor	URR	An. arabiensis	Mutant_west	Wild type	Wild type	Wild type
4	Indoor	URR	An. arabiensis	Mutant_east	Wild type	Wild type	Wild type
5	Indoor	URR	An. arabiensis	Mutant_east	Wild type	Wild type	Wild type
6	Indoor	URR	An. arabiensis	Mutant_east	Wild type	Wild type	Wild type
7	Indoor	URR	An. arabiensis	Mutant_east	Wild type	Wild type	Wild type
8	Indoor	URR	An. arabiensis	Mutant_east	Wild type	Wild type	Wild type
9	Indoor	URR	An. arabiensis	Mutant_east	Wild type	Wild type	Wild type
10	Indoor	URR	An. arabiensis	Mutant_east	Wild type	Wild type	Wild type
11	Indoor	URR	An. arabiensis	Mutant_east	Wild type	Wild type	Wild type
12	Indoor	URR	An. arabiensis	Mutant_east	Wild type	Wild type	Wild type
13	Indoor	URR	An. arabiensis	Mutant_east	Wild type	Wild type	Wild type
14	Indoor	URR	An. arabiensis	Mutant_east	Wild type	Wild type	Wild type
15	Indoor	URR	An. arabiensis	Mutant_east	Wild type	Wild type	Wild type
16	Indoor	URR	An. arabiensis	Mutant_east	Wild type	Wild type	Wild type
17	Indoor	URR	An. arabiensis	Mutant_east	Wild type	Wild type	Wild type
18	Indoor	URR	An. arabiensis	Mutant_east	Wild type	Wild type	Wild type
19	Indoor	URR	An. arabiensis	Mutant_east	Wild type	Wild type	Wild type
20	Indoor	URR	An. arabiensis	Mutant_east	Wild type	Wild type	Wild type
21	Indoor	URR	An. arabiensis	Mutant_east	Wild type	Wild type	Wild type
22	Indoor	URR	An. arabiensis	Mutant_east	Wild type	Wild type	Wild type
23	Indoor	URR	An. arabiensis	Mutant_east	Wild type	Wild type	Wild type
24	Indoor	URR	An. arabiensis	Mutant_east	Wild type	Wild type	Wild type
25	Indoor	URR	An. arabiensis	Mutant_east	Wild type	Wild type	Wild type
26	Indoor	URR	An. arabiensis	Mutant_east	Wild type	Wild type	Wild type
27	Indoor	URR	An. arabiensis	Mutant_east	Wild type	Wild type	Wild type
28	Indoor	URR	An. arabiensis	Mutant_east	Wild type	Wild type	Wild type
29	Indoor	URR	An. arabiensis	Mutant_east	Wild type	Wild type	Wild type
30	Indoor	URR	An. arabiensis	Mutant_east	Wild type	Wild type	Wild type
31	Indoor	URR	An. arabiensis	Mutant_east	Wild type	Wild type	Wild type
32	Indoor	URR	An. arabiensis	Mutant_east	Wild type	Wild type	Wild type
33	Indoor	URR	An. arabiensis	Mutant_east	Wild type	Wild type	Wild type
34	Indoor	URR	An. arabiensis	Mutant_west	Wild type	Wild type	Wild type
35	Indoor	URR	An. arabiensis	Mutant_east	Wild type	Wild type	Wild type
36	Indoor	URR	An. arabiensis	Mutant_east	Wild type	Wild type	Wild type
37	Indoor	URR	An. arabiensis	Mutant_east	Wild type	Wild type	Wild type
38	Indoor	URR	An. arabiensis	Mutant_west	Wild type	Wild type	Wild type
39	Indoor	URR	An. arabiensis	Mutant_west	Wild type	Wild type	Wild type
40	Indoor	URR	An. arabiensis	Mutant_east	Wild type	Wild type	Wild type
41	Indoor	URR	An. arabiensis	Mutant_east	Wild type	Wild type	Wild type
42	Indoor	URR	An. arabiensis	Mutant_east	Wild type	Wild type	Wild type
43	Indoor	URR	An. arabiensis	Mutant_east	Wild type	Wild type	Wild type
44	Indoor	URR	An. arabiensis	Mutant_east	Wild type	Wild type	Wild type
45	Indoor	URR	An. arabiensis	Mutant_east	Wild type	Wild type	Wild type
46	Indoor	URR	An. arabiensis	Mutant_east	Wild type	Wild type	Wild type
47	Indoor	URR	An. arabiensis	Mutant_east	Wild type	Wild type	Wild type
48	Indoor	URR	An. arabiensis	Mutant_east	Wild type	Wild type	Wild type
49	Indoor	URR	An. arabiensis	Wild type	Wild type	Wild type	Wild type
50	Indoor	URR	An. arabiensis	Mutant_east	Wild type	Wild type	Wild type
51	Indoor	URR	An. arabiensis	Mutant_east	Wild type	Wild type	Wild type
52	Indoor	URR	An. arabiensis	Mutant_east	Wild type	Wild type	Wild type
53	Indoor	URR	An. arabiensis	Mutant_east	Wild type	Wild type	Wild type
54	Indoor	URR	An. arabiensis	Mutant_east	Wild type	Wild type	Wild type
55	Indoor	URR	An. arabiensis	Mutant_east	Wild type	Wild type	Wild type
56	Indoor	URR	An. arabiensis	Mutant_east	Wild type	Wild type	Wild type
57	Indoor	URR	An. arabiensis	Mutant_east	Wild type	Wild type	Wild type
58	Indoor	URR	An. arabiensis	Mutant_east	Wild type	Wild type	Wild type
59	Indoor	URR	An. arabiensis	Mutant_east	Wild type	Wild type	Wild type
60	Indoor	URR	An. arabiensis	Mutant_east	Wild type	Wild type	Wild type
61	Indoor	URR	An. arabiensis	Wild type	Wild type	Wild type	Wild type
62	Indoor	URR	An. arabiensis	Mutant_east	Wild type	Wild type	Wild type
63	Indoor	URR	An. arabiensis	Mutant_east	Wild type	Wild type	Wild type
64	Indoor	URR	An. arabiensis	Mutant_east	Wild type	Wild type	Wild type
65	Indoor	URR	An. arabiensis	Mutant_east	Wild type	Wild type	Wild type
66	Indoor	URR	An. arabiensis	Mutant_east	Wild type	Wild type	Wild type
67	Indoor	URR	An. arabiensis	Mutant_east	Wild type	Wild type	Wild type
68	Indoor	URR	An. arabiensis	Mutant_east	Wild type	Wild type	Wild type
69	Indoor	URR	An. arabiensis	Mutant_east	Wild type	Wild type	Wild type
70	Indoor	URR	An. arabiensis	Mutant_east	Wild type	Wild type	Wild type
71	Indoor	URR	An. arabiensis	Mutant_west	Wild type	Wild type	Wild type
72	Indoor	URR	An. arabiensis	Mutant_east	Wild type	Wild type	Wild type
73	Indoor	URR	An. arabiensis	Mutant_east	Wild type	Wild type	Wild type
74	Indoor	URR	An. arabiensis	Mutant_east	Wild type	Wild type	Wild type
75	Indoor	URR	An. arabiensis	Mutant_east	Wild type	Wild type	Wild type
76	Indoor	URR	An. arabiensis	Mutant_east	Wild type	Wild type	Wild type
77	Indoor	URR	An. arabiensis	Mutant_east	Wild type	Wild type	Wild type
78	Indoor	URR	An. arabiensis	Mutant_east	Wild type	Wild type	Wild type
79	Indoor	URR	An. arabiensis	Mutant_east	Wild type	Wild type	Wild type
80	Indoor	URR	An. arabiensis	Mutant_east	Wild type	Wild type	Wild type
81	Indoor	URR	An. arabiensis	Mutant_east	Wild type	Wild type	Wild type
82	Indoor	CRR	An. arabiensis	Mutant_east	Wild type	Wild type	Wild type
83	Indoor	CRR	An. arabiensis	Mutant_east	Wild type	Wild type	Wild type
84	Indoor	CRR	An. arabiensis	Mutant_east	Wild type	Wild type	Wild type
85	Indoor	CRR	An. arabiensis	Mutant_east	Wild type	Wild type	Wild type
86	Indoor	CRR	An. arabiensis	Mutant_east	Wild type	Wild type	Wild type
87	Indoor	CRR	An. arabiensis	Mutant_east	Wild type	Wild type	Wild type
88	Indoor	CRR	An. arabiensis	Mutant_east	Wild type	Wild type	Wild type
89	Indoor	CRR	An. arabiensis	Mutant_east	Wild type	Wild type	Wild type
90	Indoor	CRR	An. arabiensis	Mutant_east	Wild type	Wild type	Wild type
91	Indoor	CRR	An. arabiensis	Mutant_east	Wild type	Wild type	Wild type
92	Indoor	CRR	An. arabiensis	Mutant_east	Wild type	Wild type	Wild type
93	Indoor	CRR	An. arabiensis	Mutant_east	Wild type	Mutant	Wild type
94	Indoor	CRR	An. arabiensis	Mutant_east	Wild type	Wild type	Wild type
95	Indoor	CRR	An. arabiensis	Mutant_east	Wild type	Mutant	Wild type
96	Indoor	CRR	An. arabiensis	Mutant_east	Wild type	Wild type	Wild type
97	Indoor	CRR	An. arabiensis	Mutant_east	Wild type	Wild type	Wild type
98	Indoor	CRR	An. arabiensis	Mutant_east	Wild type	Wild type	Wild type
99	Indoor	CRR	An. arabiensis	Mutant_east	Wild type	Wild type	Wild type
100	Indoor	CRR	An. arabiensis	Mutant_east	Wild type	Wild type	Wild type
101	Indoor	CRR	An. arabiensis	Wild type	Wild type	Mutant	Wild type
102	Indoor	CRR	An. arabiensis	Mutant_east	Wild type	Wild type	Wild type
103	Indoor	CRR	An. arabiensis	Mutant_east	Wild type	Wild type	Wild type
104	Indoor	CRR	An. arabiensis	Mutant_east	Wild type	Wild type	Wild type
105	Indoor	LRR	An. arabiensis	Mutant_east	Wild type	Wild type	Wild type
106	Indoor	LRR	An. arabiensis	Wild type	Wild type	Mutant	Wild type
107	Indoor	LRR	An. arabiensis	Mutant_east	Wild type	Wild type	Wild type
108	Indoor	LRR	An. arabiensis	Mutant_east	Wild type	Wild type	Wild type
109	Indoor	LRR	An. arabiensis	Mutant_east	Wild type	Wild type	Wild type
110	Indoor	LRR	An. arabiensis	Mutant_east	Wild type	Wild type	Wild type
111	Indoor	LRR	An. arabiensis	Mutant_east	Wild type	Wild type	Wild type
112	Indoor	LRR	An. arabiensis	Mutant_east	Wild type	Wild type	Wild type
113	Indoor	LRR	An. arabiensis	Mutant_east	Wild type	Wild type	Wild type
114	Indoor	LRR	An. arabiensis	Mutant_east	Wild type	Wild type	Wild type
115	Indoor	NBR	An. arabiensis	Mutant_east	Wild type	Wild type	Wild type
116	Indoor	NBR	An. arabiensis	Mutant_east	Wild type	Wild type	Wild type
117	Indoor	NBR	An. arabiensis	Mutant_east	Wild type	Wild type	Wild type
118	Indoor	NBR	An. arabiensis	Mutant_east	Wild type	Wild type	Wild type
119	Indoor	URR	An. arabiensis	Mutant_east	Wild type	Wild type	Wild type
120	Indoor	URR	An. arabiensis	Mutant_east	Wild type	Wild type	Wild type
121	Indoor	URR	An. arabiensis	Wild type	Wild type	Wild type	Wild type
122	Indoor	URR	An. arabiensis	Mutant_east	Wild type	Wild type	Wild type
123	Indoor	URR	An. arabiensis	Mutant_east	Wild type	Wild type	Wild type
124	Indoor	URR	An. arabiensis	Mutant_east	Wild type	Wild type	Wild type
125	Indoor	URR	An. arabiensis	Mutant_east	Wild type	Wild type	Wild type
126	Indoor	URR	An. arabiensis	Mutant_east	Wild type	Wild type	Wild type
127	Indoor	URR	An. arabiensis	Mutant_east	Wild type	Wild type	Wild type
128	Indoor	URR	An. arabiensis	Mutant_east	Wild type	Wild type	Wild type
129	Indoor	URR	An. arabiensis	Mutant_east	Wild type	Wild type	Wild type
130	Indoor	URR	An. arabiensis	Mutant_east	Wild type	Wild type	Wild type
131	Indoor	URR	An. coluzzii_An. gambiae s.s.	Mutant_west	Mutant	Wild type	Mutant
132	Indoor	URR	An. coluzzii	Mutant_west	Wild type	Wild type	Wild type
133	Indoor	URR	An. coluzzii	Mutant_east	Wild type	Wild type	Wild type
134	Indoor	URR	An. coluzzii	Mutant_west	Wild type	Mutant	Wild type
135	Indoor	URR	An. gambiae s.s.	Mutant_west	Wild type	Wild type	Wild type
136	Indoor	URR	An. coluzzii	Mutant_east	Wild type	Wild type	Wild type
137	Indoor	URR	An. coluzzii	Mutant_west	Wild type	Wild type	Wild type
138	Indoor	URR	An. coluzzii	Mutant_east	Wild type	Mutant	Wild type
139	Indoor	URR	An. coluzzii	Mutant_west	Wild type	Wild type	Wild type
140	Indoor	URR	An. gambiae s.s.	Mutant_west	Wild type	Wild type	Wild type
141	Indoor	CRR	An. coluzzii	Mutant_east	Wild type	Wild type	Wild type
142	Indoor	CRR	An. coluzzii	Mutant_east	Wild type	Wild type	Wild type
143	Indoor	LRR	An. coluzzii	Mutant_east	Wild type	Wild type	Wild type
144	Indoor	LRR	An. coluzzii	Mutant_east	Wild type	Wild type	Wild type
145	Indoor	LRR	An. coluzzii	Mutant_east	Wild type	Wild type	Wild type
146	Indoor	LRR	An. coluzzii	Mutant_east	Wild type	Wild type	Wild type
147	Indoor	LRR	An. coluzzii	Mutant_east	Wild type	Wild type	Wild type
148	Indoor	LRR	An. coluzzii	Mutant_east	Wild type	Wild type	Wild type
149	Indoor	LRR	An. coluzzii	Mutant_east	Wild type	Wild type	Wild type
150	Indoor	LRR	An. coluzzii	Mutant_east	Wild type	Wild type	Wild type
151	Indoor	LRR	An. coluzzii	Mutant_east	Wild type	Wild type	Wild type
152	Indoor	LRR	An. coluzzii	Mutant_east	Wild type	Wild type	Wild type
153	Indoor	LRR	An. coluzzii	Mutant_east	Wild type	Wild type	Wild type
154	Indoor	LRR	An. coluzzii	Mutant_east	Wild type	Wild type	Wild type
155	Indoor	LRR	An. coluzzii	Mutant_east	Wild type	Wild type	Wild type
156	Indoor	LRR	An. coluzzii	Mutant_east	Wild type	Wild type	Wild type
157	Indoor	LRR	An. coluzzii	Mutant_east	Wild type	Wild type	Wild type
158	Indoor	LRR	An. coluzzii	Mutant_east	Wild type	Wild type	Wild type
159	Indoor	LRR	An. coluzzii	Mutant_east	Wild type	Wild type	Wild type
160	Indoor	LRR	An. coluzzii	Mutant_east	Wild type	Wild type	Wild type
161	Indoor	LRR	An. coluzzii	Mutant_west	Wild type	Wild type	Wild type
162	Indoor	LRR	An. coluzzii	Mutant_west	Wild type	Wild type	Wild type
163	Indoor	LRR	An. coluzzii	Mutant_west	Wild type	Wild type	Wild type
164	Indoor	LRR	An. coluzzii	Mutant_west	Wild type	Wild type	Wild type
165	Indoor	LRR	An. coluzzii	Mutant_east	Wild type	Wild type	Wild type
166	Indoor	LRR	An. coluzzii	Mutant_west	Wild type	Wild type	Wild type
167	Indoor	LRR	An. coluzzii	Mutant_west	Wild type	Wild type	Wild type
168	Indoor	LRR	An. coluzzii	Mutant_west	Wild type	Wild type	Wild type
169	Indoor	LRR	An. coluzzii	Mutant_west	Wild type	Wild type	Wild type
170	Indoor	LRR	An. coluzzii	Mutant_west	Wild type	Wild type	Wild type
171	Indoor	LRR	An. coluzzii	Mutant_west	Wild type	Wild type	Wild type
172	Indoor	LRR	An. coluzzii	Mutant_west	Wild type	Wild type	Wild type
173	Indoor	LRR	An. coluzzii	Mutant_west	Wild type	Wild type	Wild type
174	Indoor	LRR	An. coluzzii	Mutant_west	Wild type	Wild type	Wild type
175	Indoor	LRR	An. coluzzii	Mutant_west	Wild type	Wild type	Wild type
176	Indoor	LRR	An. coluzzii	Mutant_east	Wild type	Wild type	Wild type
177	Indoor	LRR	An. coluzzii	Mutant_west	Wild type	Wild type	Wild type
178	Indoor	LRR	An. coluzzii	Mutant_west	Wild type	Wild type	Wild type
179	Indoor	LRR	An. coluzzii	Mutant_west	Wild type	Wild type	Wild type
180	Indoor	LRR	An. coluzzii	Mutant_west	Wild type	Wild type	Wild type
181	Indoor	LRR	An. coluzzii	Mutant_west	Wild type	Wild type	Wild type
182	Indoor	LRR	An. coluzzii	Mutant_west	Wild type	Wild type	Wild type
183	Indoor	LRR	An. coluzzii	Mutant_west	Wild type	Wild type	Wild type
184	Indoor	LRR	An. coluzzii	Wild type	Wild type	Wild type	Wild type
185	Indoor	LRR	An. coluzzii	Mutant_west	Wild type	Wild type	Wild type
186	Indoor	LRR	An. coluzzii	Wild type	Wild type	Wild type	Wild type
187	Indoor	LRR	An. coluzzii	Wild type	Wild type	Wild type	Wild type
188	Indoor	LRR	An. coluzzii	Mutant_west	Wild type	Wild type	Wild type
189	Indoor	LRR	An. coluzzii	Mutant_west	Wild type	Wild type	Wild type
190	Indoor	LRR	An. coluzzii	Mutant_west	Wild type	Wild type	Wild type
191	Indoor	LRR	An. coluzzii	Mutant_west	Wild type	Wild type	Wild type
192	Indoor	LRR	An. coluzzii	Mutant_west	Wild type	Wild type	Wild type
193	Indoor	LRR	An. coluzzii	Mutant_west	Wild type	Wild type	Wild type
194	Indoor	LRR	An. coluzzii	Mutant_west	Wild type	Wild type	Wild type
195	Indoor	LRR	An. coluzzii	Mutant_west	Wild type	Wild type	Wild type
196	Indoor	LRR	An. coluzzii	Mutant_west	Wild type	Wild type	Wild type
197	Indoor	LRR	An. coluzzii	Mutant_west	Wild type	Wild type	Wild type
198	Indoor	LRR	An. coluzzii	Mutant_west	Wild type	Wild type	Wild type
199	Indoor	LRR	An. coluzzii	Mutant_west	Wild type	Wild type	Wild type
200	Indoor	LRR	An. coluzzii	Mutant_west	Wild type	Wild type	Wild type
201	Indoor	LRR	An. coluzzii	Mutant_west	Wild type	Wild type	Wild type
202	Indoor	LRR	An. coluzzii	Mutant_west	Wild type	Wild type	Wild type
203	Indoor	LRR	An. coluzzii	Mutant_west	Wild type	Wild type	Wild type
204	Indoor	LRR	An. coluzzii	Mutant_west	Wild type	Wild type	Wild type
205	Indoor	LRR	An. coluzzii	Mutant_west	Wild type	Wild type	Wild type
206	Indoor	LRR	An. coluzzii	Mutant_west	Wild type	Wild type	Wild type
207	Indoor	LRR	An. coluzzii	Mutant_west	Wild type	Wild type	Wild type
208	Indoor	LRR	An. coluzzii	Mutant_west	Wild type	Wild type	Wild type
209	Indoor	LRR	An. coluzzii	Mutant_west	Wild type	Wild type	Wild type
210	Indoor	LRR	An. coluzzii	Mutant_west	Wild type	Wild type	Wild type
211	Indoor	LRR	An. coluzzii	Mutant_west	Wild type	Wild type	Wild type
212	Indoor	LRR	An. coluzzii	Mutant_west	Wild type	Wild type	Wild type
213	Indoor	LRR	An. gambiae s.s.	Mutant_east	Wild type	Wild type	Wild type
214	Indoor	LRR	An. coluzzii	Mutant_east	Wild type	Wild type	Wild type
215	Indoor	WCR	An. gambiae s.s.	Mutant_east	Wild type	Wild type	Wild type
216	Indoor	WCR	An. coluzzii_An. gambiae s.s.	Mutant_east	Wild type	Wild type	Wild type
217	Indoor	WCR	An. coluzzii_An. gambiae s.s.	Mutant_east	Wild type	Wild type	Wild type
218	Indoor	WCR	An. gambiae s.s.	Mutant_west	Mutant	Wild type	Mutant
219	Indoor	WCR	An. gambiae s.s.	Mutant_east	Wild type	Wild type	Wild type
220	Indoor	WCR	An. coluzzii_An. gambiae s.s.	Mutant_east	Wild type	Wild type	Wild type
221	Indoor	WCR	An. gambiae s.s.	Mutant_east	Wild type	Wild type	Wild type
222	Indoor	WCR	An. coluzzii_An. gambiae s.s.	Mutant_east	Wild type	Wild type	Wild type
223	Indoor	WCR	An. gambiae s.s.	Mutant_east	Wild type	Wild type	Wild type
224	Indoor	WCR	An. gambiae s.s.	Mutant_west	Wild type	Wild type	Wild type
225	Indoor	WCR	An. gambiae s.s.	Mutant_east	Wild type	Wild type	Wild type
226	Indoor	WCR	An. gambiae s.s.	Mutant_east	Wild type	Wild type	Wild type
227	Indoor	WCR	An. coluzzii_An. gambiae s.s.	Mutant_east	Wild type	Mutant	Wild type
228	Indoor	WCR	An. coluzzii_An. gambiae s.s.	Mutant_east	Wild type	Wild type	Wild type
229	Indoor	NBR	An. coluzzii_An. gambiae s.s.	Mutant_west	Mutant	Wild type	Mutant
230	Indoor	NBR	An. coluzzii	Mutant_east	Wild type	Mutant	Wild type
231	Indoor	NBR	An. gambiae s.s.	Mutant_east	Wild type	Wild type	Wild type
232	Indoor	URR	An. coluzzii	Mutant_east	Wild type	Wild type	Wild type
233	Indoor	URR	An. coluzzii	Mutant_east	Wild type	Wild type	Wild type
234	Indoor	URR	An. coluzzii	Mutant_east	Wild type	Wild type	Wild type
235	Indoor	URR	An. coluzzii	Mutant_east	Wild type	Mutant	Wild type
236	Indoor	URR	An. coluzzii	Mutant_east	Wild type	Wild type	Wild type
237	Indoor	URR	An. coluzzii	Mutant_east	Wild type	Wild type	Wild type
238	Indoor	URR	An. coluzzii	Mutant_east	Wild type	Wild type	Wild type
239	Indoor	URR	An. coluzzii	Mutant_east	Wild type	Mutant	Wild type
240	Indoor	URR	An. coluzzii	Mutant_east	Wild type	Mutant	Wild type
241	Indoor	URR	An. coluzzii	Mutant_east	Wild type	Wild type	Wild type
242	Indoor	URR	An. coluzzii	Mutant_east	Wild type	Wild type	Wild type
243	Indoor	URR	An. coluzzii	Mutant_east	Wild type	Wild type	Wild type
244	Indoor	URR	An. coluzzii	Mutant_east	Wild type	Mutant	Wild type
245	Indoor	URR	An. coluzzii	Mutant_east	Wild type	Wild type	Wild type
246	Indoor	URR	An. coluzzii	Mutant_east	Wild type	Wild type	Wild type
247	Indoor	URR	An. coluzzii	Mutant_east	Wild type	Wild type	Wild type
248	Indoor	URR	An. coluzzii	Mutant_east	Wild type	Wild type	Wild type
249	Indoor	URR	An. coluzzii	Mutant_east	Wild type	Wild type	Wild type
250	Indoor	URR	An. coluzzii	Mutant_west	Mutant	Mutant	Mutant
251	Indoor	URR	An. coluzzii	Mutant_west	Mutant	Mutant	Mutant
252	Indoor	URR	An. gambiae s.s.	Mutant_west	Mutant	Mutant	Mutant
253	Indoor	URR	An. gambiae s.s.	Mutant_west	Mutant	Mutant	Mutant
254	Indoor	URR	An. gambiae s.s.	Mutant_west	Mutant	Mutant	Mutant
255	Indoor	URR	An. coluzzii_An. gambiae s.s.	Mutant_west	Wild type	Wild type	Wild type
256	Indoor	URR	An. gambiae s.s.	Mutant_west	Mutant	Mutant	Mutant
257	Indoor	URR	An. coluzzii	Mutant_west	Mutant	Mutant	Mutant
258	Indoor	URR	An. gambiae s.s.	Mutant_west	Mutant	Mutant	Mutant
259	Indoor	URR	An. gambiae s.s.	Mutant_west	Mutant	Mutant	Mutant
260	Indoor	URR	An. coluzzii_An. gambiae s.s.	Mutant_west	Wild type	Mutant	Wild type
261	Indoor	URR	An. coluzzii	Mutant_west	Mutant	Mutant	Mutant
262	Indoor	URR	An. coluzzii	Mutant_west	Mutant	Mutant	Mutant
263	Indoor	URR	An. gambiae s.s.	Mutant_west	Mutant	Mutant	Mutant
264	Indoor	URR	An. coluzzii	Mutant_west	Wild type	Mutant	Wild type
265	Indoor	URR	An. gambiae s.s.	Mutant_west	Mutant	Mutant	Mutant
266	Indoor	URR	An. coluzzii	Mutant_west	Mutant	Mutant	Mutant
267	Indoor	URR	An. coluzzii	Mutant_west	Mutant	Mutant	Mutant
268	Indoor	URR	An. coluzzii	Mutant_west	Mutant	Mutant	Mutant
269	Indoor	URR	An. coluzzii	Mutant_west	Wild type	Mutant	Wild type
270	Indoor	URR	An. gambiae s.s.	Mutant_west	Mutant	Mutant	Mutant
271	Indoor	URR	An. coluzzii	Mutant_west	Mutant	Mutant	Mutant
272	Indoor	URR	An. coluzzii	Mutant_west	Wild type	Mutant	Wild type
273	Indoor	URR	An. coluzzii	Wild type	Mutant	Mutant	Mutant
274	Indoor	URR	An. coluzzii	Mutant_west	Mutant	Mutant	Mutant
275	Indoor	URR	An. coluzzii_An. gambiae s.s.	Wild type	Mutant	Mutant	Mutant
276	Indoor	URR	An. coluzzii_An. gambiae s.s.	Mutant_west	Mutant	Mutant	Mutant
277	Indoor	URR	An. gambiae s.s.	Mutant_west	Mutant	Mutant	Mutant
278	Indoor	URR	An. coluzzii	Mutant_west	Mutant	Mutant	Mutant
279	Indoor	URR	An. coluzzii	Mutant_east	Mutant	Mutant	Mutant
280	Indoor	URR	An. gambiae s.s.	Mutant_west	Mutant	Mutant	Mutant
281	Indoor	URR	An. coluzzii_An. gambiae s.s.	Mutant_west	Mutant	Mutant	Mutant
282	Indoor	URR	An. coluzzii	Mutant_west	Mutant	Mutant	Mutant
283	Indoor	URR	An. gambiae s.s.	Mutant_west	Mutant	Mutant	Mutant
284	Indoor	URR	An. coluzzii	Mutant_west	Mutant	Mutant	Mutant
285	Indoor	URR	An. coluzzii	Mutant_west	Mutant	Mutant	Mutant
286	Indoor	URR	An. coluzzii	Mutant_west	Mutant	Mutant	Mutant
287	Indoor	URR	An. gambiae s.s.	Mutant_west	Mutant	Mutant	Mutant
288	Indoor	URR	An. coluzzii_An. gambiae s.s.	Mutant_west	Mutant	Mutant	Mutant
289	Indoor	URR	An. gambiae s.s.	Mutant_west	Mutant	Mutant	Mutant
290	Indoor	URR	An. gambiae s.s.	Mutant_west	Mutant	Mutant	Mutant
291	Indoor	URR	An. gambiae s.s.	Mutant_west	Mutant	Mutant	Mutant
292	Indoor	URR	An. gambiae s.s.	Mutant_west	Mutant	Mutant	Mutant
293	Indoor	URR	An. coluzzii	Mutant_west	Mutant	Mutant	Mutant
294	Indoor	URR	An. gambiae s.s.	Mutant_west	Mutant	Mutant	Mutant
295	Indoor	URR	An. gambiae s.s.	Mutant_west	Mutant	Mutant	Mutant
296	Indoor	URR	An. coluzzii	Mutant_west	Mutant	Mutant	Mutant
297	Indoor	URR	An. gambiae s.s.	Mutant_west	Mutant	Mutant	Mutant
298	Indoor	URR	An. gambiae s.s.	Mutant_west	Mutant	Mutant	Mutant
299	Indoor	URR	An. gambiae s.s.	Mutant_west	Mutant	Mutant	Mutant
300	Indoor	URR	An. coluzzii	Mutant_west	Mutant	Mutant	Mutant
301	Indoor	URR	An. coluzzii	Mutant_west	Mutant	Mutant	Mutant
302	Indoor	URR	An. coluzzii	Mutant_west	Mutant	Mutant	Mutant
303	Indoor	URR	An. gambiae s.s.	Mutant_west	Mutant	Mutant	Mutant
304	Indoor	URR	An. coluzzii	Mutant_west	Mutant	Mutant	Mutant
305	Indoor	URR	An. gambiae s.s.	Mutant_west	Mutant	Mutant	Mutant
306	Indoor	URR	An. gambiae s.s.	Mutant_west	Mutant	Mutant	Mutant
307	Indoor	URR	An. coluzzii	Mutant_west	Mutant	Mutant	Mutant
308	Indoor	URR	An. gambiae s.s.	Mutant_west	Mutant	Mutant	Mutant
309	Indoor	URR	An. coluzzii	Mutant_west	Mutant	Mutant	Mutant
310	Indoor	URR	An. gambiae s.s.	Mutant_west	Mutant	Mutant	Mutant
311	Indoor	URR	An. coluzzii_An. gambiae s.s.	Mutant_west	Mutant	Mutant	Mutant
312	Indoor	URR	An. gambiae s.s.	Mutant_west	Mutant	Mutant	Mutant
313	Indoor	URR	An. coluzzii	Mutant_west	Mutant	Mutant	Mutant
314	Indoor	URR	An. coluzzii	Mutant_west	Mutant	Mutant	Mutant
315	Indoor	URR	An. gambiae s.s.	Mutant_west	Mutant	Mutant	Mutant
316	Indoor	URR	An. coluzzii	Mutant_west	Mutant	Mutant	Mutant
317	Indoor	URR	An. gambiae s.s.	Mutant_west	Mutant	Mutant	Mutant
318	Indoor	URR	An. gambiae s.s.	Mutant_west	Mutant	Mutant	Mutant
319	Indoor	URR	An. gambiae s.s.	Mutant_west	Mutant	Mutant	Mutant
320	Indoor	URR	An. coluzzii	Mutant_west	Mutant	Mutant	Mutant
321	Indoor	URR	An. gambiae s.s.	Mutant_west	Mutant	Mutant	Mutant
322	Indoor	URR	An. gambiae s.s.	Mutant_west	Mutant	Mutant	Mutant
323	Indoor	URR	An. gambiae s.s.	Mutant_west	Mutant	Mutant	Mutant
324	Indoor	URR	An. gambiae s.s.	Mutant_west	Mutant	Mutant	Mutant
325	Indoor	URR	An. gambiae s.s.	Mutant_west	Mutant	Mutant	Mutant
326	Indoor	URR	An. coluzzii	Mutant_west	Mutant	Mutant	Mutant
327	Indoor	URR	An. coluzzii	Mutant_west	Mutant	Mutant	Mutant
328	Indoor	URR	An. coluzzii	Mutant_west	Mutant	Mutant	Mutant
329	Indoor	URR	An. coluzzii	Mutant_west	Mutant	Mutant	Mutant
330	Indoor	URR	An. coluzzii	Mutant_west	Mutant	Mutant	Mutant
331	Indoor	URR	An. coluzzii	Mutant_west	Mutant	Mutant	Mutant
332	Indoor	URR	An. coluzzii	Mutant_west	Mutant	Mutant	Mutant
333	Indoor	URR	An. coluzzii	Mutant_west	Mutant	Mutant	Mutant
334	Indoor	URR	An. gambiae s.s.	Mutant_west	Mutant	Mutant	Mutant
335	Indoor	URR	An. coluzzii_An. gambiae s.s.	Mutant_west	Mutant	Mutant	Mutant
336	Indoor	URR	An. gambiae s.s.	Mutant_west	Mutant	Mutant	Mutant
337	Indoor	URR	An. coluzzii	Mutant_west	Mutant	Mutant	Mutant
338	Indoor	URR	An. gambiae s.s.	Mutant_west	Mutant	Mutant	Mutant
339	Indoor	URR	An. gambiae s.s.	Mutant_west	Mutant	Mutant	Mutant
340	Indoor	URR	An. coluzzii	Mutant_west	Mutant	Mutant	Mutant
341	Indoor	URR	An. gambiae s.s.	Mutant_west	Mutant	Mutant	Mutant
342	Indoor	URR	An. coluzzii	Mutant_west	Mutant	Mutant	Mutant
343	Indoor	URR	An. gambiae s.s.	Mutant_west	Mutant	Mutant	Mutant
344	Indoor	URR	An. coluzzii	Mutant_west	Mutant	Mutant	Mutant
345	Indoor	URR	An. coluzzii	Mutant_west	Mutant	Mutant	Mutant
346	Indoor	URR	An. gambiae s.s.	Mutant_west	Mutant	Mutant	Mutant
347	Indoor	URR	An. coluzzii	Mutant_west	Mutant	Mutant	Mutant
348	Indoor	URR	An. gambiae s.s.	Mutant_west	Mutant	Mutant	Mutant
349	Indoor	URR	An. gambiae s.s.	Mutant_west	Mutant	Mutant	Mutant
350	Indoor	URR	An. gambiae s.s.	Mutant_west	Mutant	Mutant	Mutant
351	Indoor	URR	An. gambiae s.s.	Mutant_west	Mutant	Mutant	Mutant
352	Indoor	URR	An. gambiae s.s.	Mutant_west	Mutant	Mutant	Mutant
353	Indoor	URR	An. coluzzii_An. gambiae s.s.	Mutant_west	Mutant	Mutant	Mutant
354	Indoor	URR	An. gambiae s.s.	Mutant_west	Mutant	Mutant	Mutant
355	Indoor	URR	An. gambiae s.s.	Mutant_west	Mutant	Mutant	Mutant
356	Indoor	URR	An. coluzzii	Mutant_west	Mutant	Mutant	Mutant
357	Indoor	URR	An. gambiae s.s.	Mutant_west	Wild type	Mutant	Wild type
358	Indoor	URR	An. gambiae s.s.	Mutant_west	Mutant	Mutant	Mutant
359	Indoor	URR	An. gambiae s.s.	Mutant_west	Mutant	Mutant	Mutant
360	Indoor	URR	An. coluzzii	Mutant_west	Mutant	Mutant	Mutant
361	Indoor	URR	An. gambiae s.s.	Mutant_west	Mutant	Mutant	Mutant
362	Indoor	URR	An. gambiae s.s.	Mutant_west	Mutant	Mutant	Mutant
363	Indoor	URR	An. gambiae s.s.	Mutant_west	Mutant	Mutant	Mutant
364	Indoor	URR	An. coluzzii_An. gambiae s.s.	Mutant_west	Mutant	Mutant	Mutant
365	Indoor	URR	An. gambiae s.s.	Mutant_west	Mutant	Mutant	Mutant
366	Indoor	URR	An. gambiae s.s.	Mutant_west	Mutant	Mutant	Mutant
367	Indoor	URR	An. coluzzii_An. gambiae s.s.	Mutant_west	Mutant	Mutant	Mutant
368	Indoor	URR	An. gambiae s.s.	Mutant_west	Mutant	Mutant	Mutant
369	Indoor	URR	An. coluzzii	Mutant_west	Mutant	Mutant	Mutant
370	Indoor	URR	An. coluzzii	Mutant_west	Mutant	Mutant	Mutant
371	Indoor	URR	An. coluzzii	Mutant_west	Mutant	Mutant	Mutant
372	Indoor	URR	An. gambiae s.s.	Mutant_west	Mutant	Mutant	Mutant
373	Indoor	URR	An. coluzzii	Mutant_west	Mutant	Mutant	Mutant
374	Indoor	URR	An. gambiae s.s.	Mutant_west	Mutant	Mutant	Mutant
375	Indoor	URR	An. gambiae s.s.	Mutant_west	Mutant	Mutant	Mutant
376	Indoor	URR	An. coluzzii	Mutant_west	Mutant	Mutant	Mutant
377	Indoor	URR	An. coluzzii	Mutant_west	Mutant	Mutant	Mutant
378	Indoor	URR	An. coluzzii_An. gambiae s.s.	Mutant_west	Mutant	Mutant	Mutant
379	Indoor	URR	An. gambiae s.s.	Mutant_west	Mutant	Mutant	Mutant
380	Indoor	URR	An. gambiae s.s.	Mutant_west	Mutant	Mutant	Mutant
381	Indoor	URR	An. coluzzii	Mutant_west	Mutant	Mutant	Mutant
382	Indoor	URR	An. coluzzii	Mutant_west	Mutant	Mutant	Mutant
383	Indoor	URR	An. gambiae s.s.	Mutant_west	Mutant	Mutant	Mutant
384	Indoor	URR	An. coluzzii_An. gambiae s.s.	Mutant_west	Mutant	Mutant	Mutant
385	Indoor	URR	An. gambiae s.s.	Mutant_west	Mutant	Mutant	Mutant
386	Indoor	URR	An. gambiae s.s.	Mutant_west	Mutant	Mutant	Mutant
387	Indoor	URR	An. coluzzii	Mutant_west	Mutant	Mutant	Mutant
388	Indoor	URR	An. gambiae s.s.	Mutant_west	Mutant	Mutant	Mutant
389	Indoor	URR	An. gambiae s.s.	Mutant_west	Mutant	Mutant	Mutant
390	Indoor	URR	An. gambiae s.s.	Mutant_west	Mutant	Mutant	Mutant
391	Indoor	URR	An. gambiae s.s.	Mutant_west	Mutant	Mutant	Mutant
392	Indoor	URR	An. gambiae s.s.	Mutant_west	Mutant	Mutant	Mutant
393	Indoor	URR	An. coluzzii	Mutant_west	Mutant	Mutant	Mutant
394	Indoor	URR	An. gambiae s.s.	Mutant_west	Mutant	Mutant	Mutant
395	Indoor	URR	An. coluzzii	Mutant_west	Mutant	Mutant	Mutant
396	Indoor	URR	An. coluzzii	Mutant_west	Mutant	Mutant	Mutant
397	Indoor	URR	An. gambiae s.s.	Mutant_west	Mutant	Mutant	Mutant
398	Indoor	URR	An. gambiae s.s.	Mutant_west	Mutant	Mutant	Mutant
399	Indoor	URR	An. gambiae s.s.	Mutant_west	Mutant	Mutant	Mutant
400	Indoor	URR	An. gambiae s.s.	Mutant_west	Mutant	Mutant	Mutant
401	Indoor	URR	An. coluzzii	Mutant_west	Mutant	Mutant	Mutant
402	Indoor	URR	An. coluzzii	Mutant_west	Mutant	Mutant	Mutant
403	Indoor	URR	An. coluzzii_An. gambiae s.s.	Mutant_west	Mutant	Mutant	Mutant
404	Indoor	URR	An. gambiae s.s.	Mutant_west	Mutant	Mutant	Mutant
405	Indoor	URR	An. gambiae s.s.	Mutant_west	Mutant	Mutant	Mutant
406	Outdoor	URR	An. arabiensis	Mutant_east	Wild type	Wild type	Wild type
407	Outdoor	URR	An. arabiensis	Mutant_east	Wild type	Wild type	Wild type
408	Outdoor	URR	An. arabiensis	Mutant_east	Wild type	Wild type	Wild type
409	Outdoor	URR	An. arabiensis	Wild type	Wild type	Wild type	Wild type
410	Outdoor	URR	An. arabiensis	Mutant_east	Mutant	Wild type	Mutant
411	Outdoor	URR	An. arabiensis	Mutant_east	Wild type	Wild type	Wild type
412	Outdoor	URR	An. arabiensis	Mutant_east	Wild type	Wild type	Wild type
413	Outdoor	URR	An. arabiensis	Mutant_east	Wild type	Wild type	Wild type
414	Outdoor	URR	An. arabiensis	Mutant_east	Wild type	Wild type	Wild type
415	Outdoor	URR	An. arabiensis	Wild type	Wild type	Wild type	Wild type
416	Outdoor	URR	An. arabiensis	Mutant_east	Wild type	Wild type	Wild type
417	Outdoor	URR	An. arabiensis	Mutant_east	Wild type	Wild type	Wild type
418	Outdoor	URR	An. arabiensis	Mutant_east	Wild type	Wild type	Wild type
419	Outdoor	URR	An. arabiensis	Wild type	Wild type	Wild type	Wild type
420	Outdoor	URR	An. arabiensis	Mutant_east	Wild type	Wild type	Wild type
421	Outdoor	URR	An. arabiensis	Wild type	Wild type	Wild type	Wild type
422	Outdoor	URR	An. arabiensis	Mutant_east	Wild type	Wild type	Wild type
423	Outdoor	URR	An. arabiensis	Mutant_east	Wild type	Wild type	Wild type
424	Outdoor	URR	An. arabiensis	Mutant_east	Wild type	Wild type	Wild type
425	Outdoor	URR	An. arabiensis	Mutant_east	Wild type	Wild type	Wild type
426	Outdoor	URR	An. arabiensis	Mutant_east	Wild type	Wild type	Wild type
427	Outdoor	URR	An. arabiensis	Mutant_east	Wild type	Wild type	Wild type
428	Outdoor	URR	An. arabiensis	Mutant_east	Wild type	Wild type	Wild type
429	Outdoor	URR	An. arabiensis	Mutant_east	Wild type	Wild type	Wild type
430	Outdoor	URR	An. arabiensis	Mutant_east	Wild type	Wild type	Wild type
431	Outdoor	URR	An. arabiensis	Mutant_east	Wild type	Wild type	Wild type
432	Outdoor	URR	An. arabiensis	Mutant_east	Wild type	Wild type	Wild type
433	Outdoor	URR	An. arabiensis	Wild type	Wild type	Wild type	Wild type
434	Outdoor	URR	An. arabiensis	Mutant_east	Wild type	Wild type	Wild type
435	Outdoor	URR	An. arabiensis	Mutant_east	Wild type	Wild type	Wild type
436	Outdoor	URR	An. arabiensis	Mutant_east	Wild type	Wild type	Wild type
437	Outdoor	URR	An. arabiensis	Mutant_east	Wild type	Wild type	Wild type
438	Outdoor	URR	An. arabiensis	Mutant_east	Wild type	Wild type	Wild type
439	Outdoor	URR	An. arabiensis	Mutant_east	Wild type	Wild type	Wild type
440	Outdoor	URR	An. arabiensis	Mutant_east	Wild type	Wild type	Wild type
441	Outdoor	URR	An. arabiensis	Mutant_east	Wild type	Wild type	Wild type
442	Outdoor	URR	An. arabiensis	Mutant_east	Wild type	Wild type	Wild type
443	Outdoor	URR	An. arabiensis	Wild type	Wild type	Wild type	Wild type
444	Outdoor	URR	An. arabiensis	Wild type	Wild type	Wild type	Wild type
445	Outdoor	URR	An. arabiensis	Mutant_east	Wild type	Wild type	Wild type
446	Outdoor	URR	An. arabiensis	Mutant_east	Wild type	Wild type	Wild type
447	Outdoor	URR	An. arabiensis	Mutant_east	Wild type	Wild type	Wild type
448	Outdoor	URR	An. arabiensis	Mutant_east	Wild type	Wild type	Wild type
449	Outdoor	URR	An. arabiensis	Mutant_east	Wild type	Wild type	Wild type
450	Outdoor	URR	An. arabiensis	Mutant_east	Wild type	Wild type	Wild type
451	Outdoor	URR	An. arabiensis	Mutant_east	Wild type	Wild type	Wild type
452	Outdoor	URR	An. arabiensis	Wild type	Wild type	Wild type	Wild type
453	Outdoor	URR	An. arabiensis	Mutant_east	Wild type	Wild type	Wild type
454	Outdoor	URR	An. arabiensis	Mutant_east	Wild type	Wild type	Wild type
455	Outdoor	URR	An. arabiensis	Mutant_east	Wild type	Wild type	Wild type
456	Outdoor	URR	An. arabiensis	Mutant_east	Wild type	Wild type	Wild type
457	Outdoor	URR	An. arabiensis	Mutant_east	Wild type	Wild type	Wild type
458	Outdoor	URR	An. arabiensis	Mutant_east	Wild type	Wild type	Wild type
459	Outdoor	URR	An. arabiensis	Mutant_east	Wild type	Wild type	Wild type
460	Outdoor	URR	An. arabiensis	Mutant_east	Wild type	Wild type	Wild type
461	Outdoor	URR	An. arabiensis	Wild type	Wild type	Wild type	Wild type
462	Outdoor	URR	An. arabiensis	Mutant_east	Wild type	Wild type	Wild type
463	Outdoor	URR	An. arabiensis	Mutant_east	Wild type	Wild type	Wild type
464	Outdoor	URR	An. arabiensis	Mutant_east	Wild type	Wild type	Wild type
465	Outdoor	URR	An. arabiensis	Mutant_east	Wild type	Wild type	Wild type
466	Outdoor	URR	An. arabiensis	Mutant_east	Wild type	Wild type	Wild type
467	Outdoor	URR	An. arabiensis	Mutant_east	Wild type	Wild type	Wild type
468	Outdoor	URR	An. arabiensis	Mutant_east	Wild type	Wild type	Wild type
469	Outdoor	URR	An. arabiensis	Mutant_east	Wild type	Wild type	Wild type
470	Outdoor	URR	An. arabiensis	Mutant_east	Wild type	Wild type	Wild type
471	Outdoor	URR	An. arabiensis	Mutant_east	Wild type	Wild type	Wild type
472	Outdoor	URR	An. arabiensis	Mutant_east	Wild type	Wild type	Wild type
473	Outdoor	URR	An. arabiensis	Mutant_east	Wild type	Wild type	Wild type
474	Outdoor	URR	An. arabiensis	Mutant_east	Wild type	Wild type	Wild type
475	Outdoor	URR	An. arabiensis	Mutant_east	Wild type	Wild type	Wild type
476	Outdoor	URR	An. arabiensis	Mutant_east	Wild type	Wild type	Wild type
477	Outdoor	URR	An. arabiensis	Mutant_east	Wild type	Wild type	Wild type
478	Outdoor	URR	An. arabiensis	Mutant_east	Wild type	Wild type	Wild type
479	Outdoor	URR	An. arabiensis	Mutant_east	Wild type	Wild type	Wild type
480	Outdoor	URR	An. arabiensis	Mutant_east	Wild type	Wild type	Wild type
481	Outdoor	URR	An. arabiensis	Mutant_east	Wild type	Wild type	Wild type
482	Outdoor	URR	An. arabiensis	Mutant_east	Wild type	Wild type	Wild type
483	Outdoor	URR	An. arabiensis	Mutant_east	Wild type	Wild type	Wild type
484	Outdoor	URR	An. arabiensis	Mutant_east	Wild type	Wild type	Wild type
485	Outdoor	URR	An. arabiensis	Mutant_east	Wild type	Wild type	Wild type
486	Outdoor	CRR	An. arabiensis	Mutant_west	Wild type	Wild type	Wild type
487	Outdoor	CRR	An. arabiensis	Mutant_west	Wild type	Mutant	Wild type
488	Outdoor	CRR	An. arabiensis	Mutant_west	Wild type	Wild type	Wild type
489	Outdoor	CRR	An. arabiensis	Mutant_west	Wild type	Wild type	Wild type
490	Outdoor	CRR	An. arabiensis	Mutant_west	Wild type	Mutant	Wild type
491	Outdoor	CRR	An. arabiensis	Mutant_west	Wild type	Wild type	Wild type
492	Outdoor	CRR	An. arabiensis	Mutant_west	Wild type	Wild type	Wild type
493	Outdoor	CRR	An. arabiensis	Mutant_west	Wild type	Wild type	Wild type
494	Outdoor	CRR	An. arabiensis	Mutant_west	Wild type	Mutant	Wild type
495	Outdoor	CRR	An. arabiensis	Mutant_west	Wild type	Wild type	Wild type
496	Outdoor	CRR	An. arabiensis	Mutant_west	Wild type	Wild type	Wild type
497	Outdoor	WCR	An. arabiensis	Mutant_east	Wild type	Wild type	Wild type
498	Outdoor	WCR	An. arabiensis	Mutant_east	Wild type	Wild type	Wild type
499	Outdoor	WCR	An. arabiensis	Mutant_east	Wild type	Wild type	Wild type
500	Outdoor	WCR	An. arabiensis	Mutant_east	Wild type	Wild type	Wild type
501	Outdoor	WCR	An. arabiensis	Mutant_east	Wild type	Wild type	Wild type
502	Outdoor	WCR	An. arabiensis	Mutant_east	Wild type	Wild type	Wild type
503	Outdoor	WCR	An. arabiensis	Mutant_west	Wild type	Wild type	Wild type
504	Outdoor	WCR	An. arabiensis	Mutant_east	Wild type	Wild type	Wild type
505	Outdoor	URR	An. arabiensis	Mutant_east	Wild type	Wild type	Wild type
506	Outdoor	URR	An. arabiensis	Wild type	Wild type	Wild type	Wild type
507	Outdoor	URR	An. arabiensis	Mutant_east	Wild type	Wild type	Wild type
508	Outdoor	URR	An. arabiensis	Mutant_east	Wild type	Wild type	Wild type
509	Outdoor	URR	An. arabiensis	Mutant_east	Wild type	Wild type	Wild type
510	Outdoor	URR	An. arabiensis	Mutant_east	Wild type	Wild type	Wild type
511	Outdoor	URR	An. arabiensis	Mutant_east	Wild type	Wild type	Wild type
512	Outdoor	URR	An. arabiensis	Mutant_east	Wild type	Wild type	Wild type
513	Outdoor	URR	An. arabiensis	Mutant_east	Wild type	Wild type	Wild type
514	Outdoor	URR	An. arabiensis	Mutant_east	Wild type	Wild type	Wild type
515	Outdoor	URR	An. arabiensis	Mutant_east	Wild type	Wild type	Wild type
516	Outdoor	URR	An. arabiensis	Mutant_east	Wild type	Wild type	Wild type
517	Outdoor	URR	An. arabiensis	Mutant_east	Wild type	Wild type	Wild type
518	Outdoor	URR	An. arabiensis	Mutant_east	Wild type	Wild type	Wild type
519	Outdoor	URR	An. arabiensis	Wild type	Wild type	Wild type	Wild type
520	Outdoor	URR	An. arabiensis	Mutant_east	Wild type	Wild type	Wild type
521	Outdoor	URR	An. arabiensis	Mutant_east	Wild type	Wild type	Wild type
522	Outdoor	URR	An. arabiensis	Mutant_east	Wild type	Wild type	Wild type
523	Outdoor	URR	An. arabiensis	Mutant_east	Wild type	Wild type	Wild type
524	Outdoor	URR	An. arabiensis	Wild type	Wild type	Wild type	Wild type
525	Outdoor	URR	An. arabiensis	Mutant_east	Wild type	Wild type	Wild type
526	Outdoor	URR	An. arabiensis	Wild type	Wild type	Wild type	Wild type
527	Outdoor	URR	An. arabiensis	Mutant_east	Wild type	Wild type	Wild type
528	Outdoor	URR	An. arabiensis	Mutant_east	Wild type	Wild type	Wild type
529	Outdoor	URR	An. arabiensis	Mutant_east	Wild type	Wild type	Wild type
530	Outdoor	URR	An. arabiensis	Wild type	Wild type	Wild type	Wild type
531	Outdoor	URR	An. arabiensis	Wild type	Wild type	Wild type	Wild type
532	Outdoor	URR	An. arabiensis	Mutant_east	Wild type	Wild type	Wild type
533	Outdoor	URR	An. arabiensis	Mutant_east	Wild type	Wild type	Wild type
534	Outdoor	URR	An. arabiensis	Mutant_east	Wild type	Wild type	Wild type
535	Outdoor	URR	An. arabiensis	Mutant_east	Wild type	Wild type	Wild type
536	Outdoor	URR	An. arabiensis	Mutant_east	Wild type	Wild type	Wild type
537	Outdoor	URR	An. arabiensis	Wild type	Wild type	Wild type	Wild type
538	Outdoor	URR	An. arabiensis	Mutant_east	Wild type	Wild type	Wild type
539	Outdoor	URR	An. arabiensis	Mutant_east	Wild type	Wild type	Wild type
540	Outdoor	URR	An. arabiensis	Mutant_east	Wild type	Wild type	Wild type
541	Outdoor	URR	An. arabiensis	Mutant_east	Wild type	Wild type	Wild type
542	Outdoor	URR	An. arabiensis	Mutant_west	Wild type	Wild type	Wild type
543	Outdoor	URR	An. arabiensis	Wild type	Wild type	Wild type	Wild type
544	Outdoor	URR	An. arabiensis	Wild type	Wild type	Wild type	Wild type
545	Outdoor	URR	An. arabiensis	Wild type	Wild type	Wild type	Wild type
546	Outdoor	URR	An. arabiensis	Mutant_east	Wild type	Wild type	Wild type
547	Outdoor	URR	An. arabiensis	Mutant_east	Wild type	Wild type	Wild type
548	Outdoor	URR	An. arabiensis	Mutant_east	Wild type	Wild type	Wild type
549	Outdoor	URR	An. arabiensis	Mutant_east	Wild type	Wild type	Wild type
550	Outdoor	URR	An. arabiensis	Mutant_east	Wild type	Wild type	Wild type
551	Outdoor	URR	An. arabiensis	Mutant_east	Wild type	Wild type	Wild type
552	Outdoor	URR	An. arabiensis	Mutant_east	Wild type	Wild type	Wild type
553	Outdoor	URR	An. arabiensis	Mutant_east	Wild type	Wild type	Wild type
554	Outdoor	URR	An. arabiensis	Mutant_east	Wild type	Wild type	Wild type
555	Outdoor	URR	An. arabiensis	Mutant_east	Wild type	Wild type	Wild type
556	Outdoor	URR	An. arabiensis	Mutant_east	Wild type	Wild type	Wild type
557	Outdoor	URR	An. arabiensis	Wild type	Wild type	Wild type	Wild type
558	Outdoor	URR	An. arabiensis	Mutant_east	Wild type	Wild type	Wild type
559	Outdoor	URR	An. arabiensis	Mutant_east	Wild type	Wild type	Wild type
560	Outdoor	URR	An. arabiensis	Mutant_east	Wild type	Wild type	Wild type
561	Outdoor	URR	An. arabiensis	Mutant_east	Wild type	Wild type	Wild type
562	Outdoor	URR	An. arabiensis	Mutant_east	Wild type	Wild type	Wild type
563	Outdoor	URR	An. arabiensis	Mutant_east	Wild type	Wild type	Wild type
564	Outdoor	URR	An. arabiensis	Mutant_east	Wild type	Wild type	Wild type
565	Outdoor	URR	An. arabiensis	Mutant_east	Wild type	Wild type	Wild type
566	Outdoor	URR	An. arabiensis	Mutant_east	Wild type	Wild type	Wild type
567	Outdoor	URR	An. arabiensis	Mutant_east	Wild type	Wild type	Wild type
568	Outdoor	URR	An. arabiensis	Mutant_east	Wild type	Wild type	Wild type
569	Outdoor	URR	An. arabiensis	Mutant_east	Wild type	Wild type	Wild type
570	Outdoor	URR	An. arabiensis	Mutant_east	Wild type	Wild type	Wild type
571	Outdoor	URR	An. arabiensis	Mutant_east	Wild type	Wild type	Wild type
572	Outdoor	URR	An. arabiensis	Mutant_east	Wild type	Wild type	Wild type
573	Outdoor	URR	An. arabiensis	Mutant_east	Wild type	Wild type	Wild type
574	Outdoor	URR	An. arabiensis	Mutant_east	Wild type	Wild type	Wild type
575	Outdoor	URR	An. arabiensis	Mutant_east	Wild type	Wild type	Wild type
576	Outdoor	URR	An. arabiensis	Mutant_east	Wild type	Wild type	Wild type
577	Outdoor	URR	An. arabiensis	Mutant_east	Wild type	Wild type	Wild type
578	Outdoor	URR	An. arabiensis	Mutant_east	Wild type	Wild type	Wild type
579	Outdoor	URR	An. arabiensis	Mutant_east	Wild type	Wild type	Wild type
580	Outdoor	URR	An. arabiensis	Mutant_east	Wild type	Wild type	Wild type
581	Outdoor	URR	An. arabiensis	Mutant_west	Wild type	Wild type	Wild type
582	Outdoor	URR	An. arabiensis	Wild type	Wild type	Wild type	Wild type
583	Outdoor	URR	An. arabiensis	Mutant_east	Wild type	Wild type	Wild type
584	Outdoor	URR	An. arabiensis	Mutant_east	Wild type	Wild type	Wild type
585	Outdoor	URR	An. arabiensis	Mutant_east	Wild type	Wild type	Wild type
586	Outdoor	URR	An. arabiensis	Mutant_east	Wild type	Wild type	Wild type
587	Outdoor	URR	An. arabiensis	Mutant_east	Wild type	Wild type	Wild type
588	Outdoor	URR	An. arabiensis	Mutant_east	Wild type	Wild type	Wild type
589	Outdoor	URR	An. arabiensis	Mutant_east	Wild type	Wild type	Wild type
590	Outdoor	URR	An. arabiensis	Wild type	Wild type	Wild type	Wild type
591	Outdoor	URR	An. arabiensis	Mutant_east	Wild type	Wild type	Wild type
592	Outdoor	URR	An. arabiensis	Mutant_east	Wild type	Wild type	Wild type
593	Outdoor	URR	An. arabiensis	Mutant_east	Wild type	Wild type	Wild type
594	Outdoor	URR	An. arabiensis	Mutant_west	Wild type	Wild type	Wild type
595	Outdoor	URR	An. arabiensis	Wild type	Wild type	Wild type	Wild type
596	Outdoor	URR	An. arabiensis	Wild type	Wild type	Wild type	Wild type
597	Outdoor	URR	An. arabiensis	Mutant_east	Wild type	Wild type	Wild type
598	Outdoor	URR	An. arabiensis	Mutant_east	Wild type	Wild type	Wild type
599	Outdoor	URR	An. arabiensis	Wild type	Wild type	Wild type	Wild type
600	Outdoor	URR	An. arabiensis	Mutant_east	Wild type	Wild type	Wild type
601	Outdoor	URR	An. arabiensis	Mutant_east	Wild type	Wild type	Wild type
602	Outdoor	URR	An. arabiensis	Mutant_west	Wild type	Wild type	Wild type
603	Outdoor	URR	An. arabiensis	Mutant_east	Wild type	Wild type	Wild type
604	Outdoor	URR	An. arabiensis	Mutant_east	Wild type	Wild type	Wild type
605	Outdoor	URR	An. arabiensis	Mutant_east	Wild type	Wild type	Wild type
606	Outdoor	URR	An. arabiensis	Mutant_east	Wild type	Wild type	Wild type
607	Outdoor	URR	An. arabiensis	Wild type	Wild type	Wild type	Wild type
608	Outdoor	URR	An. arabiensis	Mutant_east	Wild type	Wild type	Wild type
609	Outdoor	URR	An. arabiensis	Mutant_east	Wild type	Wild type	Wild type
610	Outdoor	URR	An. arabiensis	Mutant_east	Wild type	Wild type	Wild type
611	Outdoor	URR	An. arabiensis	Mutant_east	Wild type	Wild type	Wild type
612	Outdoor	URR	An. arabiensis	Mutant_east	Wild type	Wild type	Wild type
613	Outdoor	URR	An. arabiensis	Wild type	Wild type	Wild type	Wild type
614	Outdoor	URR	An. arabiensis	Wild type	Wild type	Wild type	Wild type
615	Outdoor	URR	An. arabiensis	Mutant_east	Wild type	Wild type	Wild type
616	Outdoor	URR	An. arabiensis	Mutant_east	Wild type	Wild type	Wild type
617	Outdoor	URR	An. arabiensis	Wild type	Wild type	Wild type	Wild type
618	Outdoor	URR	An. arabiensis	Mutant_east	Wild type	Wild type	Wild type
619	Outdoor	URR	An. arabiensis	Mutant_east	Wild type	Wild type	Wild type
620	Outdoor	URR	An. arabiensis	Wild type	Wild type	Wild type	Wild type
621	Outdoor	URR	An. arabiensis	Mutant_east	Wild type	Wild type	Wild type
622	Outdoor	URR	An. arabiensis	Mutant_east	Wild type	Wild type	Wild type
623	Outdoor	URR	An. arabiensis	Wild type	Wild type	Mutant	Wild type
624	Outdoor	URR	An. arabiensis	Wild type	Wild type	Mutant	Wild type
625	Outdoor	URR	An. arabiensis	Wild type	Wild type	Wild type	Wild type
626	Outdoor	URR	An. coluzzii	Wild type	Wild type	Wild type	Wild type
627	Outdoor	URR	An. coluzzii	Mutant_east	Wild type	Wild type	Wild type
628	Outdoor	URR	An. coluzzii	Wild type	Wild type	Wild type	Wild type
629	Outdoor	CRR	An. coluzzii	Mutant_west	Wild type	Wild type	Wild type
630	Outdoor	WCR	An. gambiae s.s.	Mutant_east	Wild type	Wild type	Wild type
631	Outdoor	WCR	An. gambiae s.s.	Mutant_east	Wild type	Wild type	Wild type
632	Outdoor	WCR	An. gambiae s.s.	Mutant_east	Wild type	Wild type	Wild type
633	Outdoor	WCR	An. gambiae s.s.	Mutant_east	Wild type	Wild type	Wild type
634	Outdoor	WCR	An. gambiae s.s.	Mutant_east	Wild type	Wild type	Wild type
635	Outdoor	WCR	An. gambiae s.s.	Mutant_east	Wild type	Wild type	Wild type
636	Outdoor	WCR	An. gambiae s.s.	Mutant_east	Wild type	Wild type	Wild type
637	Outdoor	WCR	An. gambiae s.s.	Mutant_east	Wild type	Wild type	Wild type
638	Outdoor	WCR	An. gambiae s.s.	Mutant_east	Wild type	Wild type	Wild type
639	Outdoor	WCR	An. gambiae s.s.	Mutant_east	Wild type	Wild type	Wild type
640	Outdoor	WCR	An. gambiae s.s.	Mutant_east	Wild type	Wild type	Wild type
641	Outdoor	WCR	An. coluzzii_An. gambiae s.s.	Mutant_east	Wild type	Wild type	Wild type
642	Outdoor	WCR	An. gambiae s.s.	Mutant_east	Wild type	Wild type	Wild type
643	Outdoor	WCR	An. coluzzii_An. gambiae s.s.	Mutant_east	Wild type	Wild type	Wild type
644	Outdoor	WCR	An. gambiae s.s.	Mutant_east	Wild type	Wild type	Wild type
645	Outdoor	WCR	An. gambiae s.s.	Mutant_east	Wild type	Wild type	Wild type
646	Outdoor	WCR	An. coluzzii_An. gambiae s.s.	Mutant_east	Wild type	Wild type	Wild type
647	Outdoor	WCR	An. gambiae s.s.	Mutant_east	Wild type	Wild type	Wild type
648	Outdoor	WCR	An. gambiae s.s.	Mutant_east	Wild type	Wild type	Wild type
649	Outdoor	WCR	An. gambiae s.s.	Mutant_east	Wild type	Wild type	Wild type
650	Outdoor	WCR	An. gambiae s.s.	Mutant_east	Wild type	Wild type	Wild type
651	Outdoor	WCR	An. coluzzii_An. gambiae s.s.	Mutant_east	Wild type	Wild type	Wild type
652	Outdoor	WCR	An. gambiae s.s.	Mutant_east	Wild type	Wild type	Wild type
653	Outdoor	WCR	An. gambiae s.s.	Mutant_east	Wild type	Wild type	Wild type
654	Outdoor	WCR	An. gambiae s.s.	Mutant_east	Wild type	Wild type	Wild type
655	Outdoor	WCR	An. gambiae s.s.	Mutant_east	Wild type	Wild type	Wild type
656	Outdoor	WCR	An. coluzzii_An. gambiae s.s.	Mutant_east	Wild type	Wild type	Wild type
657	Outdoor	WCR	An. gambiae s.s.	Mutant_west	Mutant	Wild type	Mutant
658	Outdoor	WCR	An. gambiae s.s.	Mutant_west	Wild type	Wild type	Wild type
659	Outdoor	WCR	An. gambiae s.s.	Mutant_west	Mutant	Wild type	Mutant
660	Outdoor	WCR	An. gambiae s.s.	Mutant_east	Wild type	Wild type	Wild type
661	Outdoor	WCR	An. gambiae s.s.	Mutant_east	Wild type	Wild type	Wild type
662	Outdoor	WCR	An. gambiae s.s.	Mutant_east	Wild type	Wild type	Wild type
663	Outdoor	WCR	An. gambiae s.s.	Mutant_east	Wild type	Wild type	Wild type
664	Outdoor	WCR	An. gambiae s.s.	Mutant_east	Wild type	Wild type	Wild type
665	Outdoor	WCR	An. gambiae s.s.	Mutant_west	Wild type	Wild type	Wild type
666	Outdoor	WCR	An. gambiae s.s.	Wild type	Wild type	Wild type	Wild type
667	Outdoor	WCR	An. coluzzii	Mutant_west	Wild type	Wild type	Wild type
668	Outdoor	URR	An. coluzzii	Mutant_west	Wild type	Wild type	Wild type
669	Outdoor	URR	An. gambiae s.s.	Mutant_east	Wild type	Wild type	Wild type
670	Outdoor	URR	An. coluzzii	Mutant_west	Mutant	Wild type	Mutant
671	Outdoor	URR	An. gambiae s.s.	Mutant_west	Mutant	Mutant	Mutant
672	Outdoor	URR	An. coluzzii	Mutant_west	Mutant	Mutant	Mutant
673	Outdoor	URR	An. gambiae s.s.	Mutant_west	Mutant	Mutant	Mutant
674	Outdoor	URR	An. coluzzii	Mutant_west	Mutant	Mutant	Mutant
675	Outdoor	URR	An. coluzzii	Mutant_west	Mutant	Mutant	Mutant
676	Outdoor	URR	An. gambiae s.s.	Mutant_west	Mutant	Mutant	Mutant
677	Outdoor	URR	An. coluzzii	Mutant_west	Mutant	Mutant	Mutant
678	Outdoor	URR	An. gambiae s.s.	Mutant_west	Mutant	Mutant	Mutant
679	Outdoor	URR	An. coluzzii	Mutant_east	Mutant	Mutant	Mutant
680	Outdoor	URR	An. coluzzii	Mutant_west	Mutant	Mutant	Mutant
681	Outdoor	URR	An. coluzzii	Mutant_west	Mutant	Mutant	Mutant
682	Outdoor	URR	An. coluzzii	Mutant_west	Mutant	Mutant	Mutant
683	Outdoor	URR	An. coluzzii	Mutant_west	Wild type	Mutant	Wild type
684	Outdoor	URR	An. gambiae s.s.	Mutant_west	Mutant	Mutant	Mutant
685	Outdoor	URR	An. coluzzii	Mutant_west	Mutant	Mutant	Mutant
686	Outdoor	URR	An. gambiae s.s.	Mutant_west	Mutant	Mutant	Mutant
687	Outdoor	URR	An. gambiae s.s.	Mutant_west	Mutant	Mutant	Mutant
688	Outdoor	URR	An. coluzzii	Mutant_west	Mutant	Mutant	Mutant
689	Outdoor	URR	An. coluzzii	Mutant_west	Mutant	Mutant	Mutant
690	Outdoor	URR	An. coluzzii	Mutant_west	Mutant	Mutant	Mutant
691	Outdoor	URR	An. gambiae s.s.	Mutant_west	Mutant	Mutant	Mutant
692	Outdoor	URR	An. gambiae s.s.	Mutant_west	Mutant	Mutant	Mutant
693	Outdoor	URR	An. coluzzii	Mutant_west	Mutant	Mutant	Mutant
694	Outdoor	URR	An. gambiae s.s.	Mutant_west	Mutant	Mutant	Mutant
695	Outdoor	URR	An. coluzzii	Mutant_west	Mutant	Mutant	Mutant
696	Outdoor	URR	An. coluzzii	Mutant_west	Mutant	Mutant	Mutant
697	Outdoor	URR	An. coluzzii	Mutant_west	Mutant	Mutant	Mutant
698	Outdoor	URR	An. gambiae s.s.	Mutant_west	Mutant	Mutant	Mutant
699	Outdoor	URR	An. coluzzii_An. gambiae s.s.	Mutant_west	Mutant	Mutant	Mutant
700	Outdoor	URR	An. gambiae s.s.	Mutant_west	Mutant	Mutant	Mutant
701	Outdoor	URR	An. gambiae s.s.	Mutant_west	Mutant	Mutant	Mutant
702	Outdoor	URR	An. gambiae s.s.	Mutant_west	Mutant	Mutant	Mutant
703	Outdoor	URR	An. coluzzii_An. gambiae s.s.	Mutant_west	Mutant	Mutant	Mutant
704	Outdoor	URR	An. gambiae s.s.	Mutant_west	Mutant	Mutant	Mutant
705	Outdoor	URR	An. gambiae s.s.	Mutant_west	Mutant	Mutant	Mutant
706	Outdoor	URR	An. gambiae s.s.	Mutant_west	Mutant	Mutant	Mutant
707	Outdoor	URR	An. coluzzii	Mutant_west	Mutant	Mutant	Mutant
708	Outdoor	URR	An. coluzzii	Mutant_west	Mutant	Mutant	Mutant
709	Outdoor	URR	An. coluzzii_An. gambiae s.s.	Mutant_west	Mutant	Mutant	Mutant
710	Outdoor	URR	An. gambiae s.s.	Mutant_west	Mutant	Mutant	Mutant
711	Outdoor	URR	An. gambiae s.s.	Mutant_west	Mutant	Mutant	Mutant
712	Outdoor	URR	An. coluzzii	Mutant_west	Mutant	Mutant	Mutant
713	Outdoor	URR	An. gambiae s.s.	Mutant_west	Mutant	Mutant	Mutant
714	Outdoor	URR	An. gambiae s.s.	Mutant_west	Mutant	Mutant	Mutant
715	Outdoor	URR	An. coluzzii	Mutant_west	Mutant	Mutant	Mutant
716	Outdoor	URR	An. coluzzii_An. gambiae s.s.	Mutant_west	Mutant	Mutant	Mutant
717	Outdoor	URR	An. gambiae s.s.	Mutant_west	Mutant	Mutant	Mutant
718	Outdoor	URR	An. gambiae s.s.	Mutant_west	Mutant	Mutant	Mutant
719	Outdoor	URR	An. gambiae s.s.	Mutant_west	Mutant	Mutant	Mutant
720	Outdoor	URR	An. gambiae s.s.	Mutant_west	Mutant	Mutant	Mutant
721	Outdoor	URR	An. coluzzii	Mutant_west	Mutant	Mutant	Mutant
722	Outdoor	URR	An. gambiae s.s.	Mutant_west	Mutant	Mutant	Mutant
723	Outdoor	URR	An. gambiae s.s.	Mutant_west	Mutant	Mutant	Mutant
724	Outdoor	URR	An. gambiae s.s.	Mutant_west	Mutant	Mutant	Mutant
725	Outdoor	URR	An. gambiae s.s.	Mutant_west	Mutant	Mutant	Mutant
726	Outdoor	URR	An. gambiae s.s.	Mutant_west	Mutant	Mutant	Mutant
727	Outdoor	URR	An. coluzzii	Mutant_west	Mutant	Mutant	Mutant
728	Outdoor	URR	An. gambiae s.s.	Mutant_west	Mutant	Mutant	Mutant
729	Outdoor	URR	An. gambiae s.s.	Mutant_west	Mutant	Mutant	Mutant
730	Outdoor	URR	An. coluzzii_An. gambiae s.s.	Mutant_west	Mutant	Mutant	Mutant
731	Outdoor	URR	An. coluzzii	Mutant_west	Mutant	Mutant	Mutant
732	Outdoor	URR	An. coluzzii	Mutant_west	Mutant	Mutant	Mutant
733	Outdoor	URR	An. coluzzii_An. gambiae s.s.	Mutant_west	Mutant	Mutant	Mutant
734	Outdoor	URR	An. gambiae s.s.	Mutant_west	Mutant	Mutant	Mutant
735	Outdoor	URR	An. coluzzii	Mutant_west	Mutant	Mutant	Mutant
736	Outdoor	URR	An. gambiae s.s.	Mutant_west	Mutant	Mutant	Mutant
737	Outdoor	URR	An. gambiae s.s.	Mutant_west	Mutant	Mutant	Mutant
738	Outdoor	URR	An. gambiae s.s.	Mutant_west	Mutant	Mutant	Mutant
739	Outdoor	URR	An. gambiae s.s.	Mutant_west	Mutant	Mutant	Mutant
740	Outdoor	URR	An. gambiae s.s.	Mutant_west	Mutant	Mutant	Mutant
741	Outdoor	URR	An. coluzzii	Mutant_west	Mutant	Mutant	Mutant
742	Outdoor	URR	An. gambiae s.s.	Mutant_west	Mutant	Mutant	Mutant
743	Outdoor	URR	An. gambiae s.s.	Mutant_west	Mutant	Mutant	Mutant
744	Outdoor	URR	An. gambiae s.s.	Mutant_west	Mutant	Mutant	Mutant
745	Outdoor	URR	An. gambiae s.s.	Mutant_west	Mutant	Mutant	Mutant
746	Outdoor	URR	An. coluzzii_An. gambiae s.s.	Mutant_west	Mutant	Mutant	Mutant
747	Outdoor	URR	An. coluzzii	Mutant_west	Mutant	Mutant	Mutant
748	Outdoor	URR	An. gambiae s.s.	Mutant_west	Mutant	Mutant	Mutant
749	Outdoor	URR	An. gambiae s.s.	Mutant_west	Mutant	Mutant	Mutant
750	Outdoor	URR	An. gambiae s.s.	Mutant_west	Mutant	Mutant	Mutant
751	Outdoor	URR	An. gambiae s.s.	Mutant_west	Mutant	Mutant	Mutant
752	Outdoor	URR	An. gambiae s.s.	Mutant_west	Mutant	Mutant	Mutant
753	Outdoor	URR	An. gambiae s.s.	Mutant_west	Mutant	Mutant	Mutant
754	Outdoor	URR	An. coluzzii_An. gambiae s.s.	Mutant_west	Mutant	Mutant	Mutant
755	Outdoor	URR	An. gambiae s.s.	Mutant_west	Mutant	Mutant	Mutant
756	Outdoor	URR	An. gambiae s.s.	Mutant_west	Mutant	Mutant	Mutant
757	Outdoor	URR	An. gambiae s.s.	Mutant_west	Mutant	Mutant	Mutant
758	Outdoor	URR	An. gambiae s.s.	Mutant_west	Mutant	Mutant	Mutant
759	Outdoor	URR	An. gambiae s.s.	Mutant_west	Mutant	Mutant	Mutant
760	Outdoor	URR	An. coluzzii	Mutant_west	Mutant	Mutant	Mutant
761	Outdoor	URR	An. gambiae s.s.	Mutant_west	Mutant	Mutant	Mutant
762	Outdoor	URR	An. gambiae s.s.	Mutant_west	Mutant	Mutant	Mutant
763	Outdoor	URR	An. gambiae s.s.	Mutant_west	Wild type	Mutant	Wild type
764	Outdoor	URR	An. gambiae s.s.	Mutant_west	Mutant	Mutant	Mutant
765	Outdoor	URR	An. gambiae s.s.	Mutant_west	Mutant	Mutant	Mutant
766	Outdoor	URR	An. gambiae s.s.	Mutant_west	Mutant	Mutant	Mutant
767	Outdoor	URR	An. gambiae s.s.	Mutant_west	Mutant	Mutant	Mutant
768	Outdoor	URR	An. coluzzii_An. gambiae s.s.	Mutant_west	Mutant	Mutant	Mutant
769	Outdoor	URR	An. coluzzii_An. gambiae s.s.	Mutant_west	Mutant	Mutant	Mutant
770	Outdoor	URR	An. gambiae s.s.	Mutant_west	Mutant	Mutant	Mutant
771	Outdoor	URR	An. gambiae s.s.	Mutant_west	Mutant	Mutant	Mutant
772	Outdoor	URR	An. gambiae s.s.	Mutant_west	Mutant	Mutant	Mutant
773	Outdoor	URR	An. coluzzii	Mutant_west	Mutant	Mutant	Mutant
774	Outdoor	URR	An. gambiae s.s.	Mutant_west	Mutant	Mutant	Mutant
775	Outdoor	URR	An. gambiae s.s.	Mutant_west	Mutant	Mutant	Mutant
776	Outdoor	URR	An. gambiae s.s.	Mutant_west	Mutant	Mutant	Mutant
777	Outdoor	URR	An. gambiae s.s.	Mutant_west	Mutant	Mutant	Mutant
778	Outdoor	URR	An. gambiae s.s.	Mutant_west	Mutant	Mutant	Mutant
779	Outdoor	URR	An. gambiae s.s.	Mutant_west	Mutant	Mutant	Mutant
780	Outdoor	URR	An. coluzzii	Mutant_west	Mutant	Mutant	Mutant
781	Outdoor	URR	An. coluzzii	Mutant_west	Mutant	Mutant	Mutant
782	Outdoor	URR	An. gambiae s.s.	Mutant_west	Mutant	Mutant	Mutant
783	Outdoor	URR	An. gambiae s.s.	Mutant_west	Mutant	Mutant	Mutant
784	Outdoor	URR	An. coluzzii	Mutant_west	Mutant	Mutant	Mutant
785	Outdoor	URR	An. coluzzii	Mutant_west	Mutant	Mutant	Mutant
786	Outdoor	URR	An. gambiae s.s.	Mutant_west	Mutant	Mutant	Mutant
787	Outdoor	URR	An. coluzzii	Mutant_west	Mutant	Mutant	Mutant
788	Outdoor	URR	An. gambiae s.s.	Mutant_west	Mutant	Mutant	Mutant
789	Outdoor	URR	An. gambiae s.s.	Mutant_west	Mutant	Mutant	Mutant
790	Outdoor	URR	An. coluzzii	Mutant_west	Mutant	Mutant	Mutant
791	Outdoor	URR	An. coluzzii	Mutant_west	Mutant	Mutant	Mutant
792	Outdoor	URR	An. coluzzii	Mutant_west	Mutant	Mutant	Mutant
793	Outdoor	URR	An. gambiae s.s.	Mutant_west	Mutant	Mutant	Mutant
794	Outdoor	URR	An. coluzzii_An. gambiae s.s.	Mutant_west	Mutant	Mutant	Mutant
795	Outdoor	URR	An. coluzzii	Mutant_west	Mutant	Mutant	Mutant
796	Outdoor	URR	An. gambiae s.s.	Mutant_west	Mutant	Mutant	Mutant
797	Outdoor	URR	An. gambiae s.s.	Mutant_west	Mutant	Mutant	Mutant
798	Outdoor	URR	An. coluzzii	Mutant_west	Mutant	Mutant	Mutant
799	Outdoor	URR	An. coluzzii_An. gambiae s.s.	Mutant_west	Mutant	Mutant	Mutant
800	Outdoor	URR	An. gambiae s.s.	Mutant_west	Mutant	Mutant	Mutant
801	Outdoor	URR	An. gambiae s.s.	Mutant_west	Mutant	Mutant	Mutant
802	Outdoor	URR	An. gambiae s.s.	Mutant_west	Mutant	Mutant	Mutant
803	Outdoor	URR	An. gambiae s.s.	Mutant_west	Mutant	Mutant	Mutant
804	Outdoor	URR	An. coluzzii	Mutant_west	Mutant	Mutant	Mutant
805	Outdoor	URR	An. gambiae s.s.	Mutant_west	Mutant	Mutant	Mutant
806	Outdoor	URR	An. coluzzii	Mutant_west	Mutant	Mutant	Mutant
807	Outdoor	URR	An. gambiae s.s.	Mutant_west	Mutant	Mutant	Mutant
808	Outdoor	URR	An. coluzzii	Mutant_west	Mutant	Mutant	Mutant
809	Outdoor	URR	An. gambiae s.s.	Mutant_west	Mutant	Mutant	Mutant
810	Outdoor	URR	An. gambiae s.s.	Mutant_west	Mutant	Mutant	Mutant
811	Outdoor	URR	An. gambiae s.s.	Mutant_west	Mutant	Mutant	Mutant
812	Outdoor	URR	An. gambiae s.s.	Mutant_west	Mutant	Mutant	Mutant
813	Outdoor	URR	An. gambiae s.s.	Mutant_west	Mutant	Mutant	Mutant
814	Outdoor	URR	An. gambiae s.s.	Mutant_west	Mutant	Mutant	Mutant
815	Outdoor	URR	An. gambiae s.s.	Mutant_west	Mutant	Mutant	Mutant
816	Outdoor	URR	An. gambiae s.s.	Mutant_west	Mutant	Mutant	Mutant
817	Outdoor	URR	An. gambiae s.s.	Mutant_west	Mutant	Mutant	Mutant
818	Outdoor	URR	An. gambiae s.s.	Mutant_west	Mutant	Mutant	Mutant
819	Outdoor	URR	An. coluzzii	Mutant_west	Mutant	Mutant	Mutant
820	Outdoor	URR	An. gambiae s.s.	Mutant_west	Mutant	Mutant	Mutant
821	Outdoor	URR	An. coluzzii	Mutant_west	Mutant	Mutant	Mutant
822	Outdoor	URR	An. coluzzii	Mutant_west	Mutant	Mutant	Mutant
823	Outdoor	URR	An. gambiae s.s.	Mutant_west	Mutant	Mutant	Mutant
824	Outdoor	URR	An. gambiae s.s.	Mutant_west	Mutant	Mutant	Mutant
825	Outdoor	URR	An. gambiae s.s.	Mutant_west	Mutant	Mutant	Mutant
826	Outdoor	URR	An. gambiae s.s.	Mutant_west	Mutant	Mutant	Mutant
827	Outdoor	URR	An. gambiae s.s.	Mutant_west	Mutant	Mutant	Mutant
828	Outdoor	URR	An. melas	Mutant_east	Wild type	Wild type	Wild type
829	Indoor	CRR	An. melas	Mutant_east	Wild type	Wild type	Wild type
830	Indoor	LRR	An. melas	Mutant_east	Wild type	Wild type	Wild type
831	Indoor	LRR	An. melas	Mutant_east	Wild type	Wild type	Wild type
832	Indoor	LRR	An. melas	Mutant_east	Wild type	Wild type	Wild type
833	Indoor	LRR	An. melas	Mutant_east	Wild type	Wild type	Wild type
834	Indoor	LRR	An. melas	Mutant_east	Wild type	Wild type	Wild type
835	Indoor	LRR	An. melas	Mutant_east	Wild type	Wild type	Wild type
836	Indoor	LRR	An. melas	Mutant_east	Wild type	Wild type	Wild type
837	Indoor	LRR	An. melas	Mutant_east	Wild type	Wild type	Wild type
838	Indoor	LRR	An. melas	Mutant_east	Wild type	Wild type	Wild type
839	Indoor	LRR	An. melas	Mutant_east	Wild type	Wild type	Wild type
840	Indoor	LRR	An. melas	Mutant_east	Wild type	Wild type	Wild type
841	Indoor	LRR	An. melas	Mutant_east	Wild type	Wild type	Wild type
842	Indoor	LRR	An. melas	Mutant_east	Wild type	Wild type	Wild type
843	Indoor	LRR	An. melas	Mutant_east	Wild type	Wild type	Wild type
844	Indoor	LRR	An. melas	Mutant_east	Wild type	Wild type	Wild type

## Sheet: Blood meal data
Serial Number	Resting location	Species ID	Host blood
1	Indoor	An. coluzzii-An. gambiae s.s.	Cow
2	Indoor	An. coluzzii-An. gambiae s.s.	Cow
3	Indoor	An. gambiae s.s.	Cow
4	Indoor	An. gambiae s.s.	Cow
5	Indoor	An. coluzzii-An. gambiae s.s.	Goat
6	Indoor	An. gambiae s.s.	Donkey
7	Indoor	An. coluzzii-An. gambiae s.s.	Cow
8	Indoor	An. coluzzii-An. gambiae s.s.	Cow
9	Indoor	An. gambiae s.s.	Donkey
10	Indoor	An. arabiensis	Donkey
11	Indoor	An. arabiensis	Donkey
12	Indoor	An. arabiensis	Donkey
13	Indoor	An. arabiensis	Donkey
14	Indoor	An. arabiensis	Donkey
15	Indoor	An. coluzzii	Cow
16	Indoor	An. arabiensis	Human
17	Indoor	An. arabiensis	Donkey
18	Indoor	An. arabiensis	Donkey
19	Indoor	An. arabiensis	Donkey
20	Indoor	An. arabiensis	Donkey
21	Indoor	An. arabiensis	Donkey
22	Indoor	An. arabiensis	Goat
23	Indoor	An. coluzzii	Cow
24	Indoor	An. coluzzii	Cow
25	Indoor	An. coluzzii	Cow
26	Indoor	An. coluzzii	Cow
27	Indoor	An. coluzzii	Goat
28	Indoor	An. coluzzii	Donkey
29	Indoor	An. arabiensis	Cow
30	Indoor	An. arabiensis	Donkey
31	Indoor	An. arabiensis	Dog
32	Indoor	An. arabiensis	Donkey
33	Indoor	An. arabiensis	Donkey
34	Indoor	An. arabiensis	Donkey
35	Indoor	An. arabiensis	Cow
36	Indoor	An. arabiensis	Cow
37	Indoor	An. gambiae s.s.	Human+goat
38	Indoor	An. arabiensis	Goat
39	Indoor	An. arabiensis	Human
40	Indoor	An. gambiae s.s.	Human
41	Indoor	An. coluzzii	Donkey
42	Indoor	An. coluzzii	Cow
43	Indoor	An. coluzzii	Cow
44	Indoor	An. coluzzii	Cow
45	Indoor	An. gambiae s.s.	Cow
46	Indoor	An. coluzzii	Donkey
47	Indoor	An. coluzzii	Donkey
48	Indoor	An. coluzzii	Cow
49	Indoor	An. coluzzii	Donkey
50	Indoor	An. gambiae s.s.	Cow
51	Indoor	An. coluzzii	Goat
52	Indoor	An. coluzzii	Cow
53	Indoor	An. coluzzii	Donkey
54	Indoor	An. coluzzii	Human
55	Indoor	An. gambiae s.s.	Cow
56	Indoor	An. coluzzii-An. gambiae s.s.	Cow
57	Indoor	An. gambiae s.s.	Human
58	Indoor	An. coluzzii	Cow
59	Indoor	An. coluzzii-An. gambiae s.s.	Cow
60	Indoor	An. coluzzii	Donkey
61	Indoor	An. arabiensis	Donkey
62	Indoor	An. gambiae s.s.	Donkey
63	Indoor	An. arabiensis	Donkey
64	Indoor	An. arabiensis	Donkey
65	Indoor	An. coluzzii	Donkey
66	Indoor	An. coluzzii	Donkey
67	Indoor	An. coluzzii	Donkey
68	Indoor	An. coluzzii-An. gambiae s.s.	Donkey
69	Indoor	An. arabiensis	Donkey
70	Indoor	An. arabiensis	Goat
71	Indoor	An. arabiensis	Cow+goat
72	Indoor	An. arabiensis	Cow
73	Indoor	An. arabiensis	Human+dog
74	Indoor	An. arabiensis	Dog
75	Indoor	An. arabiensis	Cow
76	Indoor	An. arabiensis	Cow
77	Indoor	An. arabiensis	Cow
78	Indoor	An. arabiensis	Donkey
79	Indoor	An. coluzzii	Human
80	Indoor	An. arabiensis	Cow+goat
81	Indoor	An. arabiensis	Cow
82	Indoor	An. arabiensis	Cow
83	Indoor	An. arabiensis	Cow
84	Indoor	An. arabiensis	Cow
85	Indoor	An. arabiensis	Donkey
86	Indoor	An. arabiensis	Cow
87	Indoor	An. coluzzii	Human
88	Indoor	An. gambiae s.s.	Cow
89	Indoor	An. gambiae s.s.	Cow
90	Indoor	An. gambiae s.s.	Cow
91	Indoor	An. gambiae s.s.	Cow
92	Indoor	An. gambiae s.s.	Cow
93	Indoor	An. gambiae s.s.	Cow
94	Indoor	An. coluzzii-An. gambiae s.s.	Cow
95	Indoor	An. gambiae s.s.	Cow
96	Indoor	An. gambiae s.s.	Cow
97	Indoor	An. coluzzii	Donkey
98	Indoor	An. coluzzii	Donkey
99	Indoor	An. gambiae s.s.	Cow
100	Indoor	An. gambiae s.s.	Cow
101	Indoor	An. gambiae s.s.	Donkey
102	Indoor	An. gambiae s.s.	Donkey
103	Indoor	An. gambiae s.s.	Cow
104	Indoor	An. gambiae s.s.	Cow
105	Indoor	An. gambiae s.s.	Cow
106	Indoor	An. gambiae s.s.	Cow
107	Indoor	An. gambiae s.s.	Donkey
108	Indoor	An. gambiae s.s.	Cow
109	Indoor	An. gambiae s.s.	Goat
110	Indoor	An. gambiae s.s.	Cow
111	Indoor	An. arabiensis	Human
112	Indoor	An. gambiae s.s.	Cow
113	Indoor	An. coluzzii	Human
114	Indoor	An. coluzzii	Human
115	Indoor	An. coluzzii	Human+cow
116	Indoor	An. coluzzii	Cow
117	Indoor	An. coluzzii	Human+cow
118	Indoor	An. coluzzii	Human
119	Indoor	An. coluzzii	Human+goat
120	Indoor	An. coluzzii	Donkey
121	Indoor	An. coluzzii	Cow
122	Indoor	An. coluzzii	Human
123	Indoor	An. gambiae s.s.	Human+goat
124	Indoor	An. arabiensis	Donkey
125	Indoor	An. arabiensis	Cow
126	Indoor	An. arabiensis	Cow
127	Indoor	An. arabiensis	Horse
128	Indoor	An. arabiensis	Cow
129	Indoor	An. arabiensis	Cow
130	Indoor	An. arabiensis	Cow
131	Indoor	An. arabiensis	Cow
132	Indoor	An. arabiensis	Donkey
133	Indoor	An. arabiensis	Donkey
134	Indoor	An. arabiensis	Cow
135	Indoor	An. arabiensis	Donkey
136	Indoor	An. coluzzii	Cow
137	Indoor	An. arabiensis	Cow
138	Indoor	An. arabiensis	Cow
139	Indoor	An. arabiensis	Donkey
140	Indoor	An. arabiensis	Donkey
141	Indoor	An. arabiensis	Goat
142	Indoor	An. arabiensis	Donkey
143	Indoor	An. arabiensis	Cow
144	Indoor	An. coluzzii	Donkey
145	Outdoor	An. arabiensis	Donkey
146	Outdoor	An. arabiensis	Human
147	Outdoor	An. arabiensis	Donkey
148	Outdoor	An. arabiensis	Donkey
149	Outdoor	An. arabiensis	Donkey
150	Outdoor	An. arabiensis	Donkey
151	Outdoor	An. arabiensis	Donkey
152	Outdoor	An. arabiensis	Cow
153	Outdoor	An. arabiensis	Donkey
154	Outdoor	An. arabiensis	Donkey
155	Outdoor	An. arabiensis	Donkey
156	Outdoor	An. arabiensis	Donkey
157	Outdoor	An. arabiensis	Donkey
158	Outdoor	An. arabiensis	Donkey
159	Outdoor	An. arabiensis	Donkey
160	Outdoor	An. arabiensis	Cow
161	Outdoor	An. arabiensis	Donkey
162	Outdoor	An. arabiensis	Goat
163	Outdoor	An. arabiensis	Donkey
164	Outdoor	An. arabiensis	Donkey
165	Outdoor	An. arabiensis	Donkey
166	Outdoor	An. arabiensis	Donkey
167	Outdoor	An. arabiensis	Donkey
168	Outdoor	An. arabiensis	Human+cow
169	Outdoor	An. arabiensis	Donkey
170	Outdoor	An. arabiensis	Dog
171	Outdoor	An. arabiensis	Donkey
172	Outdoor	An. arabiensis	Donkey
173	Outdoor	An. arabiensis	Donkey
174	Outdoor	An. arabiensis	Donkey
175	Outdoor	An. arabiensis	Donkey
176	Outdoor	An. arabiensis	Donkey
177	Outdoor	An. arabiensis	Donkey
178	Outdoor	An. arabiensis	Donkey
179	Outdoor	An. arabiensis	Donkey
180	Outdoor	An. arabiensis	Donkey
181	Outdoor	An. arabiensis	Donkey
182	Outdoor	An. gambiae s.s.	Human
183	Outdoor	An. coluzzii	Donkey
184	Outdoor	An. gambiae s.s.	Donkey
185	Outdoor	An. gambiae s.s.	Donkey
186	Outdoor	An. coluzzii	Goat
187	Outdoor	An. coluzzii	Donkey
188	Outdoor	An. gambiae s.s.	Donkey
189	Outdoor	An. gambiae s.s.	Human
190	Outdoor	An. gambiae s.s.	Donkey
191	Outdoor	An. coluzzii-An. gambiae s.s.	Donkey
192	Outdoor	An. coluzzii	Donkey
193	Outdoor	An. gambiae s.s.	Donkey
194	Outdoor	An. coluzzii	Donkey
195	Outdoor	An. coluzzii	Donkey
196	Outdoor	An. gambiae s.s.	Cow
197	Outdoor	An. coluzzii	Donkey
198	Outdoor	An. gambiae s.s.	Cow
199	Outdoor	An. gambiae s.s.	Cow
200	Outdoor	An. gambiae s.s.	Dog
201	Outdoor	An. coluzzii	Cow
202	Outdoor	An. coluzzii-An. gambiae s.s.	Cow
203	Outdoor	An. coluzzii	Donkey
204	Outdoor	An. coluzzii	Cow
205	Outdoor	An. coluzzii	Dog
206	Outdoor	An. coluzzii	Cow+goat
207	Outdoor	An. coluzzii-An. gambiae s.s.	Donkey
208	Outdoor	An. gambiae s.s.	Donkey
209	Outdoor	An. gambiae s.s.	Cow
210	Outdoor	An. gambiae s.s.	Cow
211	Outdoor	An. arabiensis	Cow
212	Outdoor	An. gambiae s.s.	Cow
213	Outdoor	An. coluzzii-An. gambiae s.s.	Cow
214	Outdoor	An. coluzzii-An. gambiae s.s.	Cow
215	Outdoor	An. gambiae s.s.	Cow
216	Outdoor	An. gambiae s.s.	Cow
217	Outdoor	An. gambiae s.s.	Cow
218	Outdoor	An. arabiensis	Cow
219	Outdoor	An. gambiae s.s.	Cow
220	Outdoor	An. gambiae s.s.	Cow
221	Outdoor	An. gambiae s.s.	Cow
222	Outdoor	An. coluzzii-An. gambiae s.s.	Cow
223	Outdoor	An. gambiae s.s.	Cow
224	Outdoor	An. gambiae s.s.	Cow
225	Outdoor	An. arabiensis	Goat
226	Outdoor	An. gambiae s.s.	Cow+dog
227	Outdoor	An. arabiensis	Cow
228	Outdoor	An. gambiae s.s.	Cow
229	Outdoor	An. gambiae s.s.	Donkey
230	Outdoor	An. gambiae s.s.	Cow
231	Outdoor	An. gambiae s.s.	Cow
232	Outdoor	An. gambiae s.s.	Goat
233	Outdoor	An. gambiae s.s.	Cow
234	Outdoor	An. arabiensis	Cow
235	Outdoor	An. gambiae s.s.	Donkey
236	Outdoor	An. gambiae s.s.	Cow
237	Outdoor	An. coluzzii-An. gambiae s.s.	Human
238	Outdoor	An. gambiae s.s.	Cow
239	Outdoor	An. gambiae s.s.	Chicken
240	Outdoor	An. coluzzii	Cow
241	Outdoor	An. coluzzii	Cow
242	Outdoor	An. coluzzii	Cow
243	Outdoor	An. coluzzii	Cow
244	Outdoor	An. coluzzii	Cow
245	Outdoor	An. gambiae s.s.	Cow
246	Outdoor	An. coluzzii	Goat
247	Outdoor	An. coluzzii	Donkey
248	Outdoor	An. coluzzii	Cow
249	Outdoor	An. coluzzii	Donkey
250	Outdoor	An. coluzzii	Donkey
251	Outdoor	An. coluzzii	Donkey

## Sheet: Sporozoite positivity data
Serial Number	Resting location	Village	Species ID	Sporozoite status
1	Indoor	URR	An. arabiensis	P. falciparum
2	Indoor	URR	An. arabiensis	P. falciparum
3	Indoor	URR	An. gambiae s.s.	P. falciparum
4	Indoor	URR	An. gambiae s.s.	P. falciparum
5	Indoor	URR	An. gambiae s.s.	P. falciparum
6	Indoor	URR	An. coluzzii	P. falciparum
7	Outdoor	URR	An. arabiensis	P. falciparum
8	Outdoor	URR	An. arabiensis	P. falciparum
9	Outdoor	URR	An. arabiensis	P. falciparum
10	Outdoor	URR	An. arabiensis	P. falciparum
11	Outdoor	URR	An. coluzzii-gambiae s.s.	P. falciparum
